# Supplementary material
Source: PubMed Central journal article supplement (PMC3349841)

Exon coverage for *COL6A1*

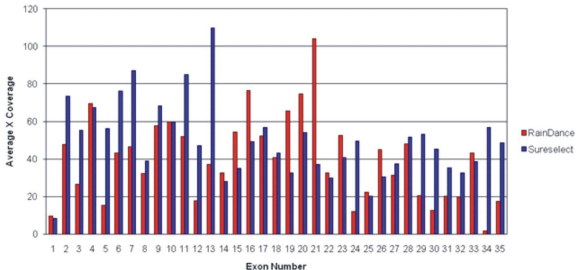

**Supplemental Figure S1.**

Supplement: mmc1.pdf [file mmc1.pdf]

Exon coverage for *LARGE*

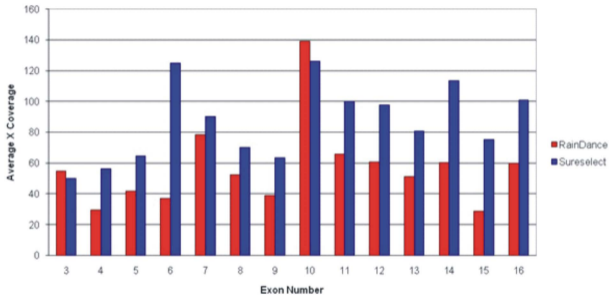

**Supplemental Figure S10.**

Supplement: mmc10.pdf [file mmc10.pdf]

Exon coverage for *POMGNT1*

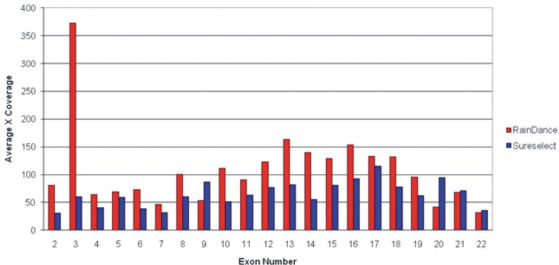

**Supplemental Figure S11.**

Supplement: mmc11.pdf [file mmc11.pdf]

Exon coverage for *POMT2*

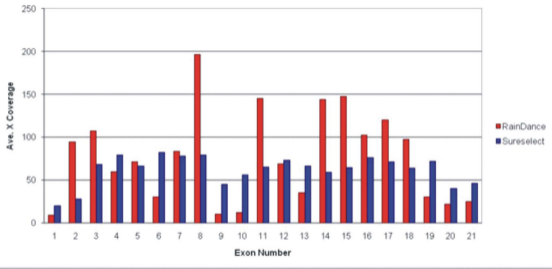

**Supplemental Figure S12.**

Supplement: mmc12.pdf [file mmc12.pdf]

Exon coverage for *LAMA2*

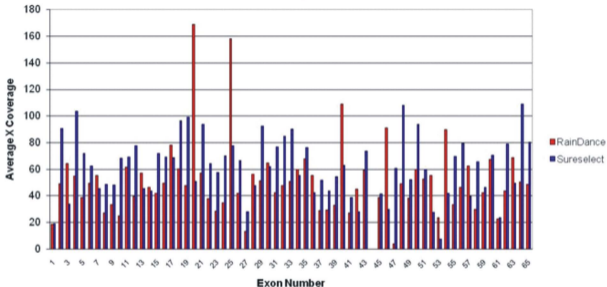

Supplemental Figure S2.

Supplement: mmc2.pdf [file mmc2.pdf]

Exon coverage for *POMT1*

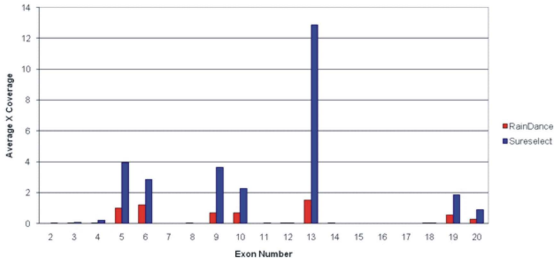

**Supplemental Figure 3.**

Supplement: mmc3.pdf [file mmc3.pdf]

Exon coverage for *SEPN1*

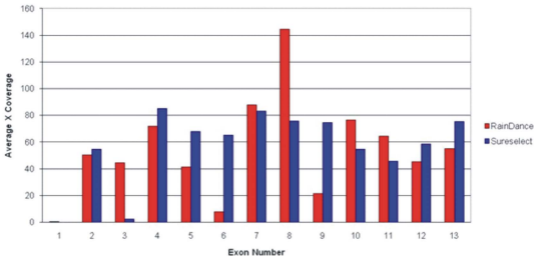

**Supplemental Figure S4.**

Supplement: mmc4.pdf [file mmc4.pdf]

Exon coverage for COL6A2

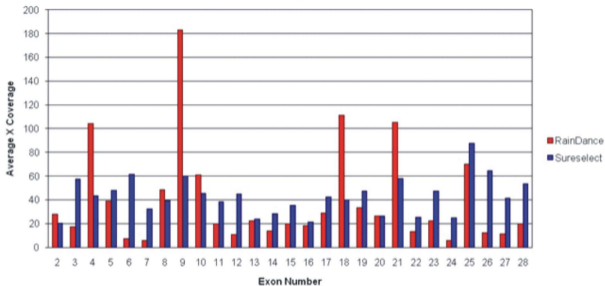

**Supplemental Figure S5.**

Supplement: mmc5.pdf [file mmc5.pdf]

Exon coverage for COL6A3

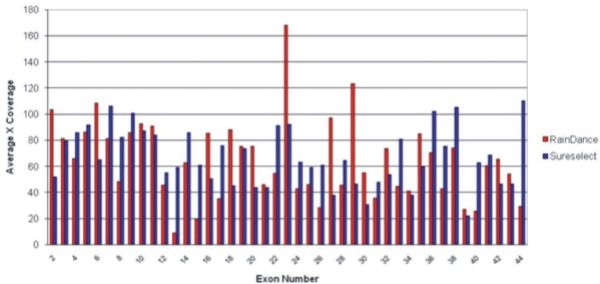

Supplemental Figure S6.

Supplement: mmc6.pdf [file mmc6.pdf]

Exon coverage for *FKTN*

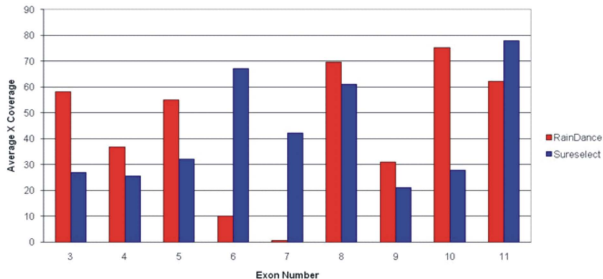

**Supplemental Figure S7.**

Supplement: mmc7.pdf [file mmc7.pdf]

Exon coverage for *FKRP*

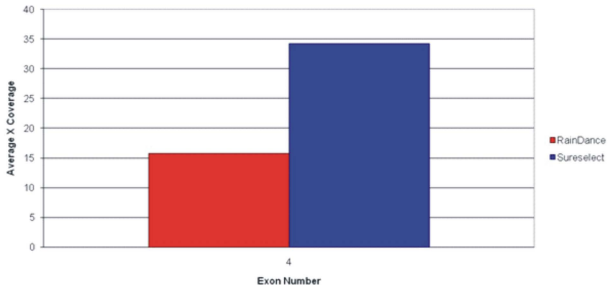

**Supplemental Figure S8.**

Supplement: mmc8.pdf [file mmc8.pdf]

Exon coverage for *ITGA7*

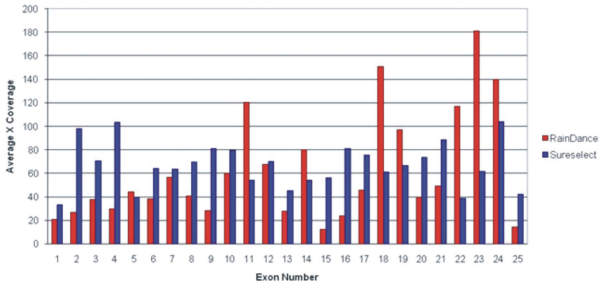

**Supplemental Figure S9.**

Supplement: mmc9.pdf [file mmc9.pdf]
